# Supplementary material for: Multiscale modeling of VOC–graphene nanostructure interactions: designing new sorbents for portable mass spectrometric applications
Source: Royal Society of Chemistry journal article supplement (doi:10.1039/d3ja00216k), 2023-01-01
Supplement: d3ja00216k1.pdf [file d3ja00216k1.pdf]

## SUPPLEMENTARY MATERIALS

### Multiscale modeling of VOC-graphene nanostructure interactions: designing new sorbents for portable mass spectrometric applications

Stevan Armaković<sup>1,\*</sup>, Milena Aleksić<sup>2</sup>, Stamatios Giannoukos<sup>3</sup>, Boris Brkić<sup>2,\*</sup>

<sup>1</sup>University of Novi Sad, Faculty of Sciences, Department of Physics, Trg D. Obradovića 4, 21000  
Novi Sad, Serbia

<sup>2</sup>BioSense Institute, University of Novi Sad, Dr Zorana Djindjića 1, 21000 Novi Sad, Serbia

<sup>3</sup>Department of Chemistry and Applied Biosciences, ETH Zurich, HCI D 317, Vladimir-Prelog-Weg  
3, CH-8093 Zurich, Switzerland

\* Correspondence: [stevan.armakovic@df.uns.ac.rs](mailto:stevan.armakovic@df.uns.ac.rs) ; [boris.brkic@biosense.rs](mailto:boris.brkic@biosense.rs)

Table S1. Calculated binding energies [kcal/mol] between VOC molecules and modeled sorbents

| VOC             | GR     | GR_O   | GR_OH  | GR_hole | TENAX  |
|-----------------|--------|--------|--------|---------|--------|
| 1-propanol      | -5.70  | -8.86  | -11.84 | -6.27   | -6.55  |
| 2-propanol      | -5.86  | -8.98  | -10.37 | -6.95   | -7.67  |
| acetic-acid     | -4.72  | -10.82 | -14.75 | -7.11   | -9.07  |
| acetone         | -3.92  | -9.72  | -11.51 | -7.72   | -7.91  |
| butyric-acid    | -7.74  | -12.90 | -15.49 | -9.51   | -7.69  |
| ethanol         | -4.39  | -7.03  | -10.50 | -5.69   | -7.63  |
| isobutyric-acid | -8.18  | -13.27 | -17.63 | -8.45   | -11.03 |
| isoprene        | -10.40 | -11.40 | -11.57 | -10.36  | -9.24  |
| n-pentan        | -8.42  | -8.28  | -9.60  | -8.78   | -7.38  |
| propionic-acid  | -6.54  | -12.27 | -15.09 | -8.19   | -9.88  |

The data from this table was used to generate Figure 5 from the main text.
